# Supplementary material
Source: PubMed Central journal article supplement (PMC5062957)
Supplement: NIHMS815480-supplement-6.pdf [file NIHMS815480-supplement-6.pdf]

**Supplementary Table 1. Genes selectively expressed in POA<sup>PACAP/BDNF</sup> neurons.** Related to Figure 1 TRAP RNA-Seq results.

Enrichment values show mean ratio between RPKM values of IP and input fraction across 2 experiments

Genes with log2Enrichment>1 in all 4 TRAP experiments are shown.

Neuropeptides highlighted in Figure 1L are shown in blue

| Gene Name     | Log2 Enrichment (PACAP-GFPL10a) | Log2 Enrichment (BDNF-GFPL10a) |
|---------------|---------------------------------|--------------------------------|
| Ucn3          | 4.22                            | 3.47                           |
| Gng8          | 3.76                            | 3.33                           |
| Nme4          | 3.36                            | 2.78                           |
| Nxph4         | 3.98                            | 2.00                           |
| Adcyap1       | 2.86                            | 2.93                           |
| Ghrh          | 2.84                            | 2.52                           |
| Samd3         | 2.57                            | 2.61                           |
| Emx2          | 2.51                            | 2.54                           |
| Efcab10       | 2.77                            | 2.20                           |
| Bdnf          | 2.91                            | 2.01                           |
| Pcdhgb4       | 1.91                            | 2.96                           |
| Rspo3         | 1.80                            | 2.68                           |
| Nrn1          | 2.18                            | 2.12                           |
| Fezf1         | 1.86                            | 2.43                           |
| Gm10094       | 2.32                            | 1.90                           |
| Tm4sf5        | 2.23                            | 1.95                           |
| C1ql1         | 1.87                            | 2.27                           |
| Brs3          | 2.58                            | 1.40                           |
| Gm35595       | 2.19                            | 1.75                           |
| Nhlh2         | 2.05                            | 1.88                           |
| D330045A20Rik | 2.03                            | 1.84                           |
| Cstad         | 2.19                            | 1.60                           |
| Cbln2         | 2.20                            | 1.55                           |
| Gm5617        | 2.40                            | 1.20                           |
| Hopx          | 2.01                            | 1.56                           |
| Pcbd1         | 1.74                            | 1.71                           |
| Fam19a1       | 1.76                            | 1.61                           |
| Trh           | 1.39                            | 1.96                           |
| Insm2         | 1.81                            | 1.51                           |
| Crip2         | 1.94                            | 1.37                           |
| Cetn2         | 1.84                            | 1.43                           |
| A230065H16Rik | 1.64                            | 1.62                           |
| Gmip          | 1.80                            | 1.46                           |
| Slc17a6       | 1.57                            | 1.67                           |

|         |      |      |
|---------|------|------|
| Rps271  | 1.50 | 1.73 |
| Fam183b | 1.55 | 1.63 |
| Mrpl54  | 1.56 | 1.45 |
| Sncg    | 1.36 | 1.64 |
| Adamts2 | 1.49 | 1.45 |
| Resp18  | 1.52 | 1.35 |
| Gpx3    | 1.39 | 1.44 |
| Mrpl34  | 1.24 | 1.37 |
| Creb3l1 | 1.20 | 1.30 |
| Klhdc8b | 1.33 | 1.16 |
