# Supplementary material
Source: PubMed Central journal article supplement (PMC5062957)

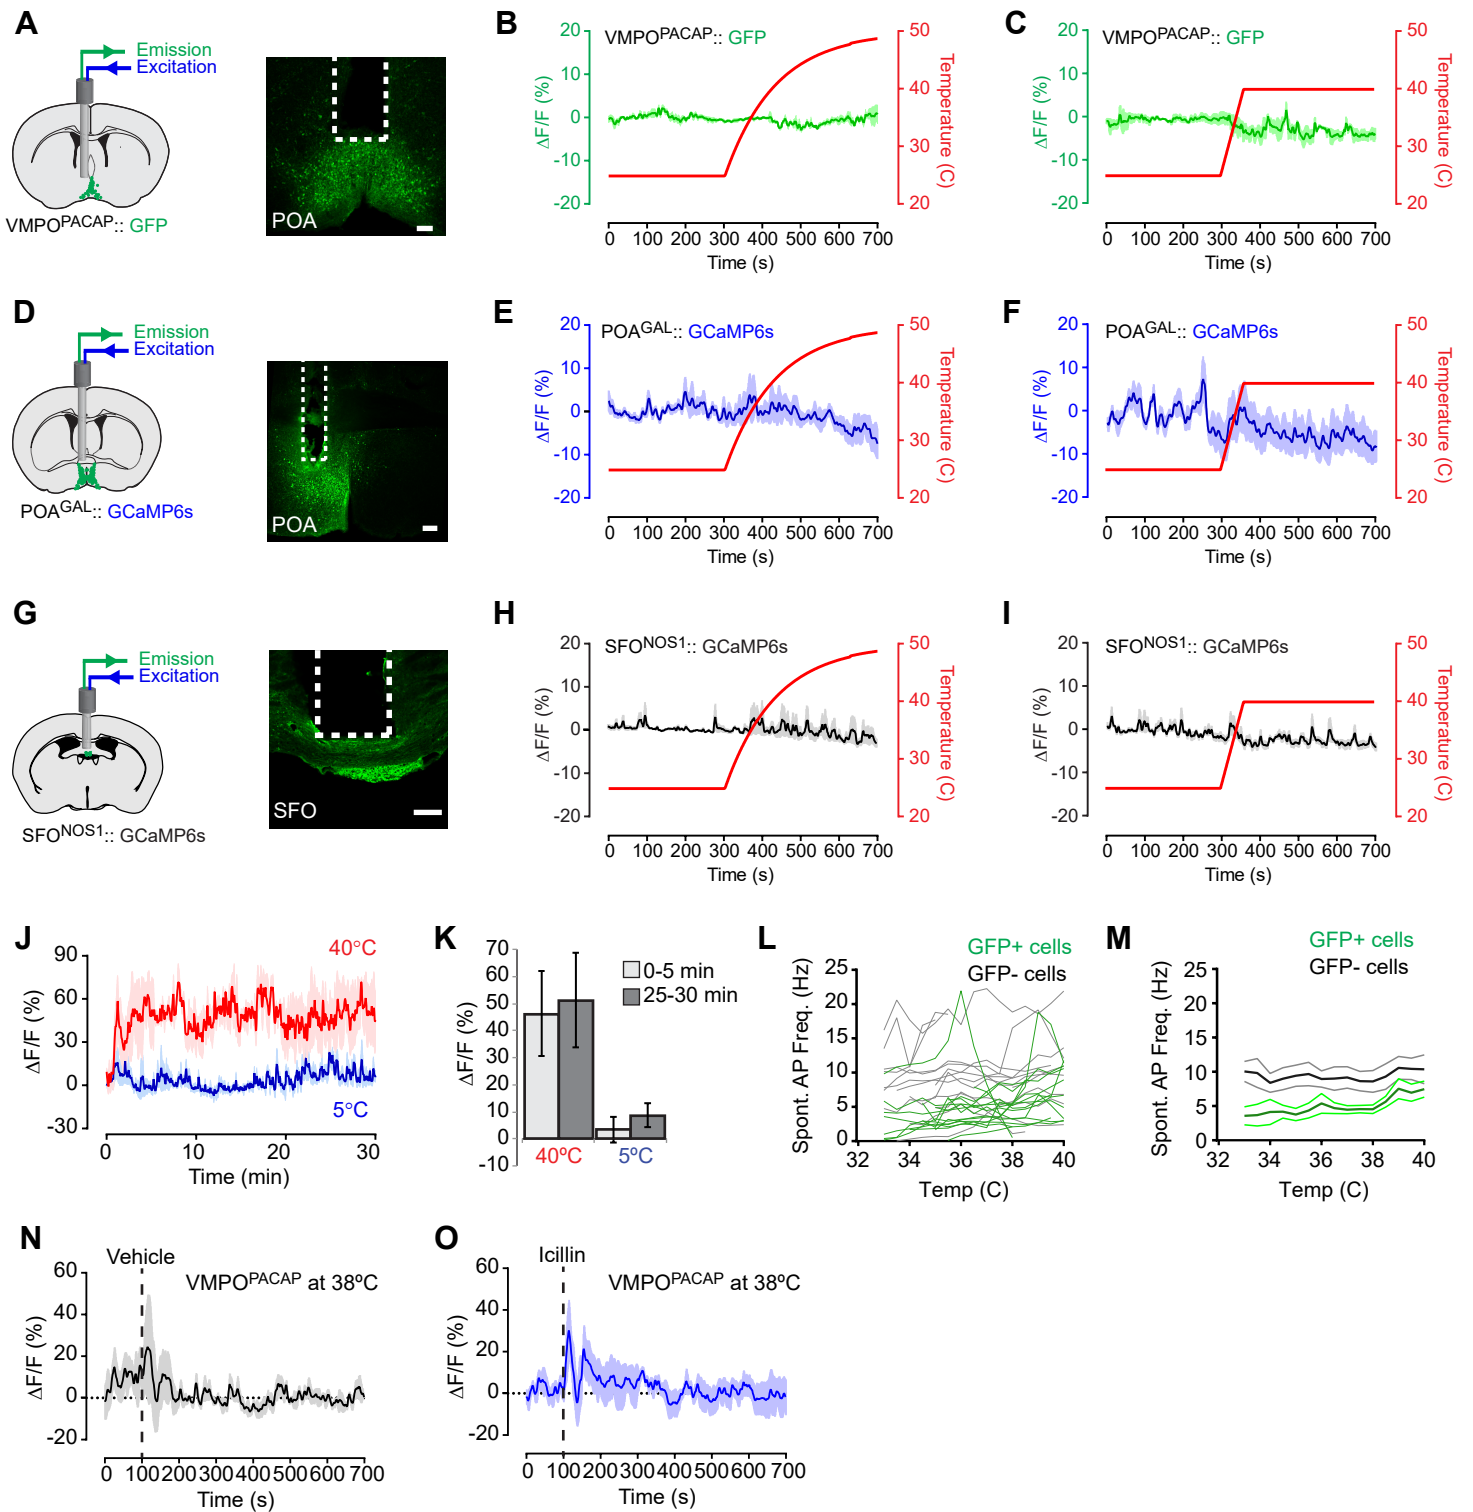

**Figure S2**

Supplement: NIHMS815480-supplement-1.pdf [file NIHMS815480-supplement-1.pdf]

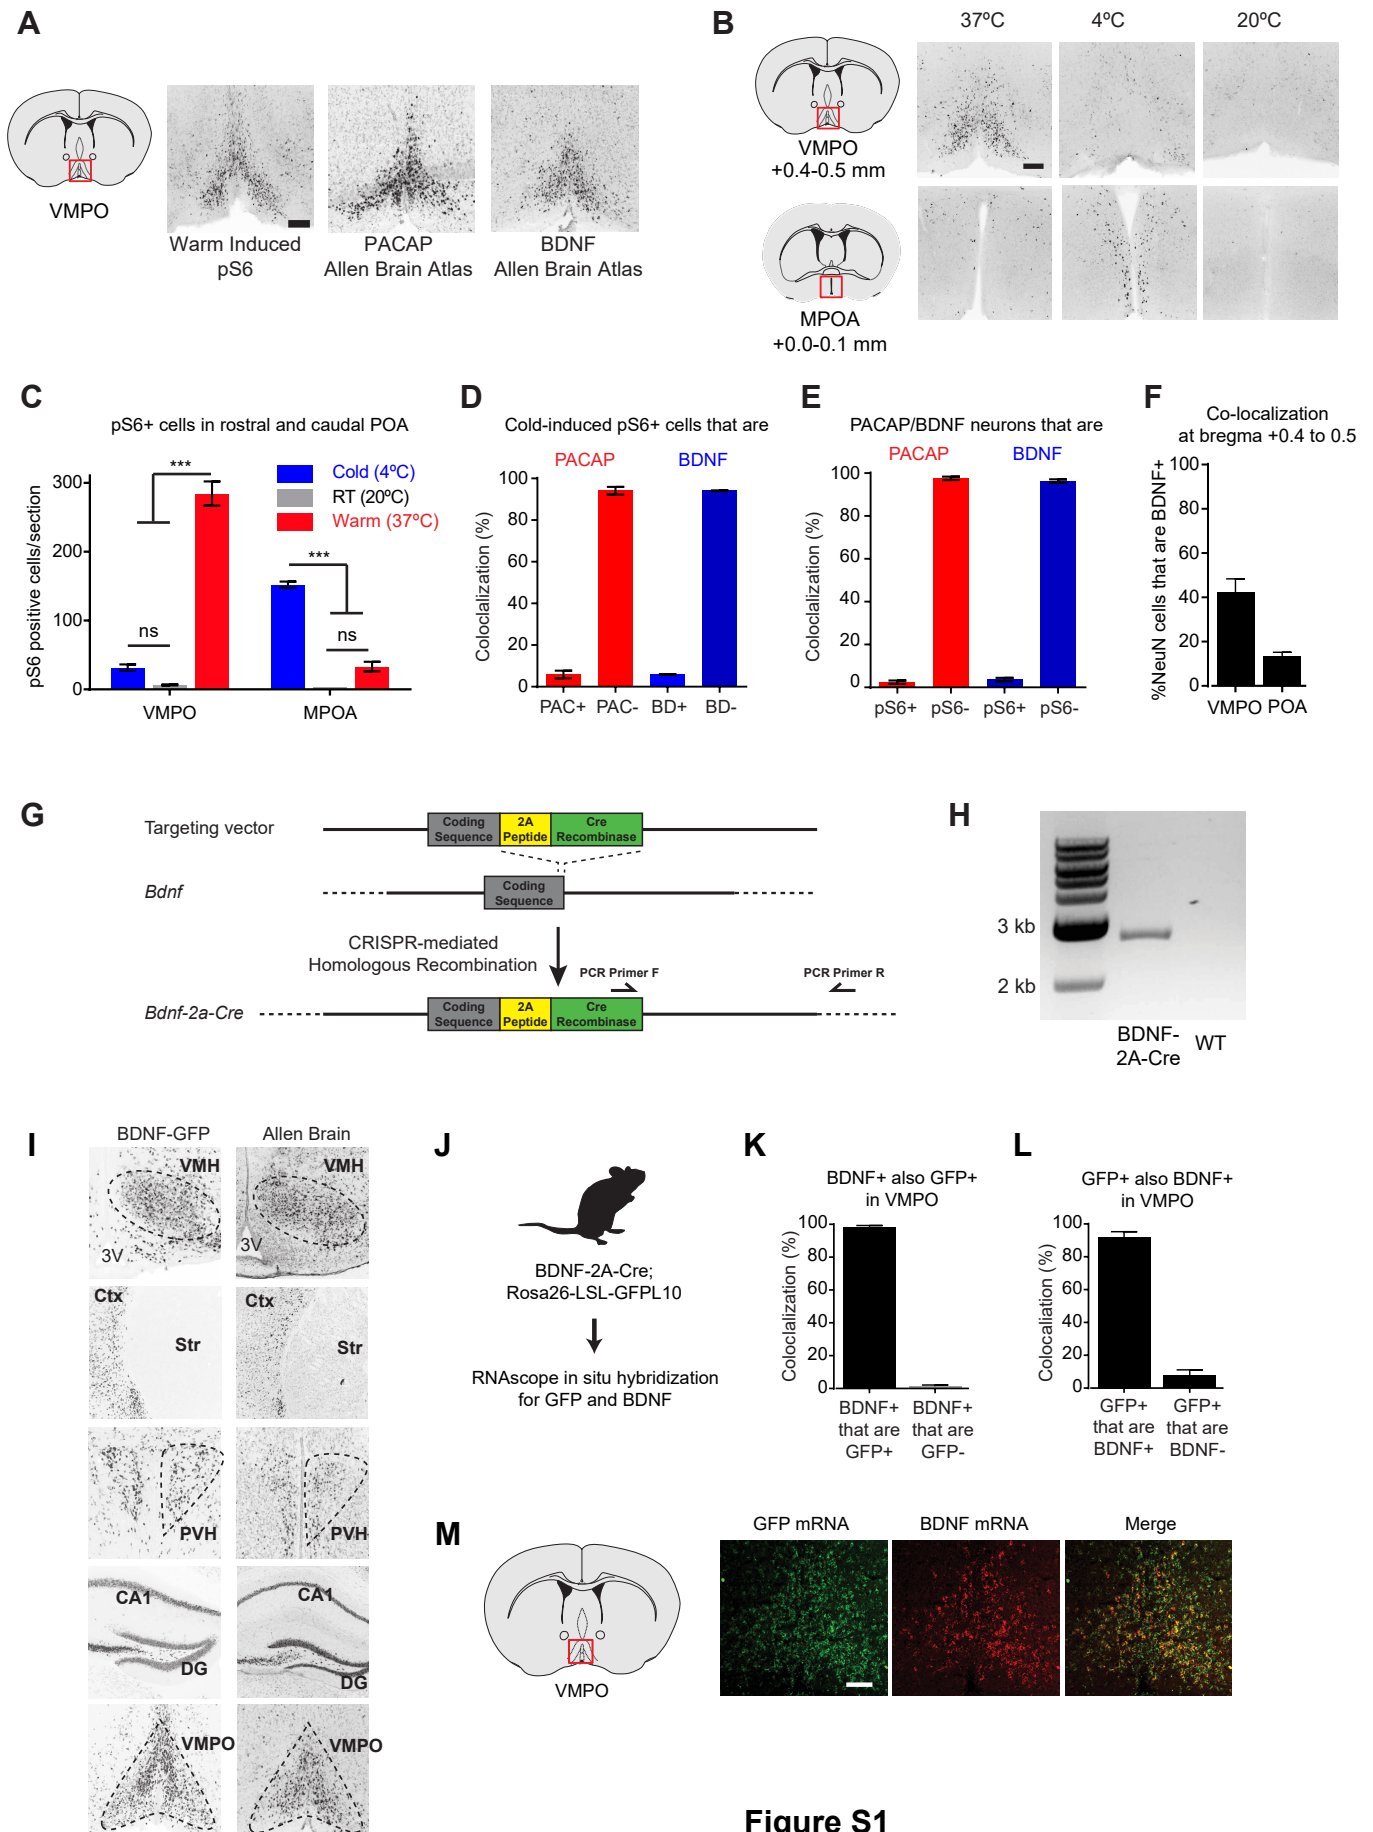

Figure S1

Supplement: NIHMS815480-supplement-2.pdf [file NIHMS815480-supplement-2.pdf]

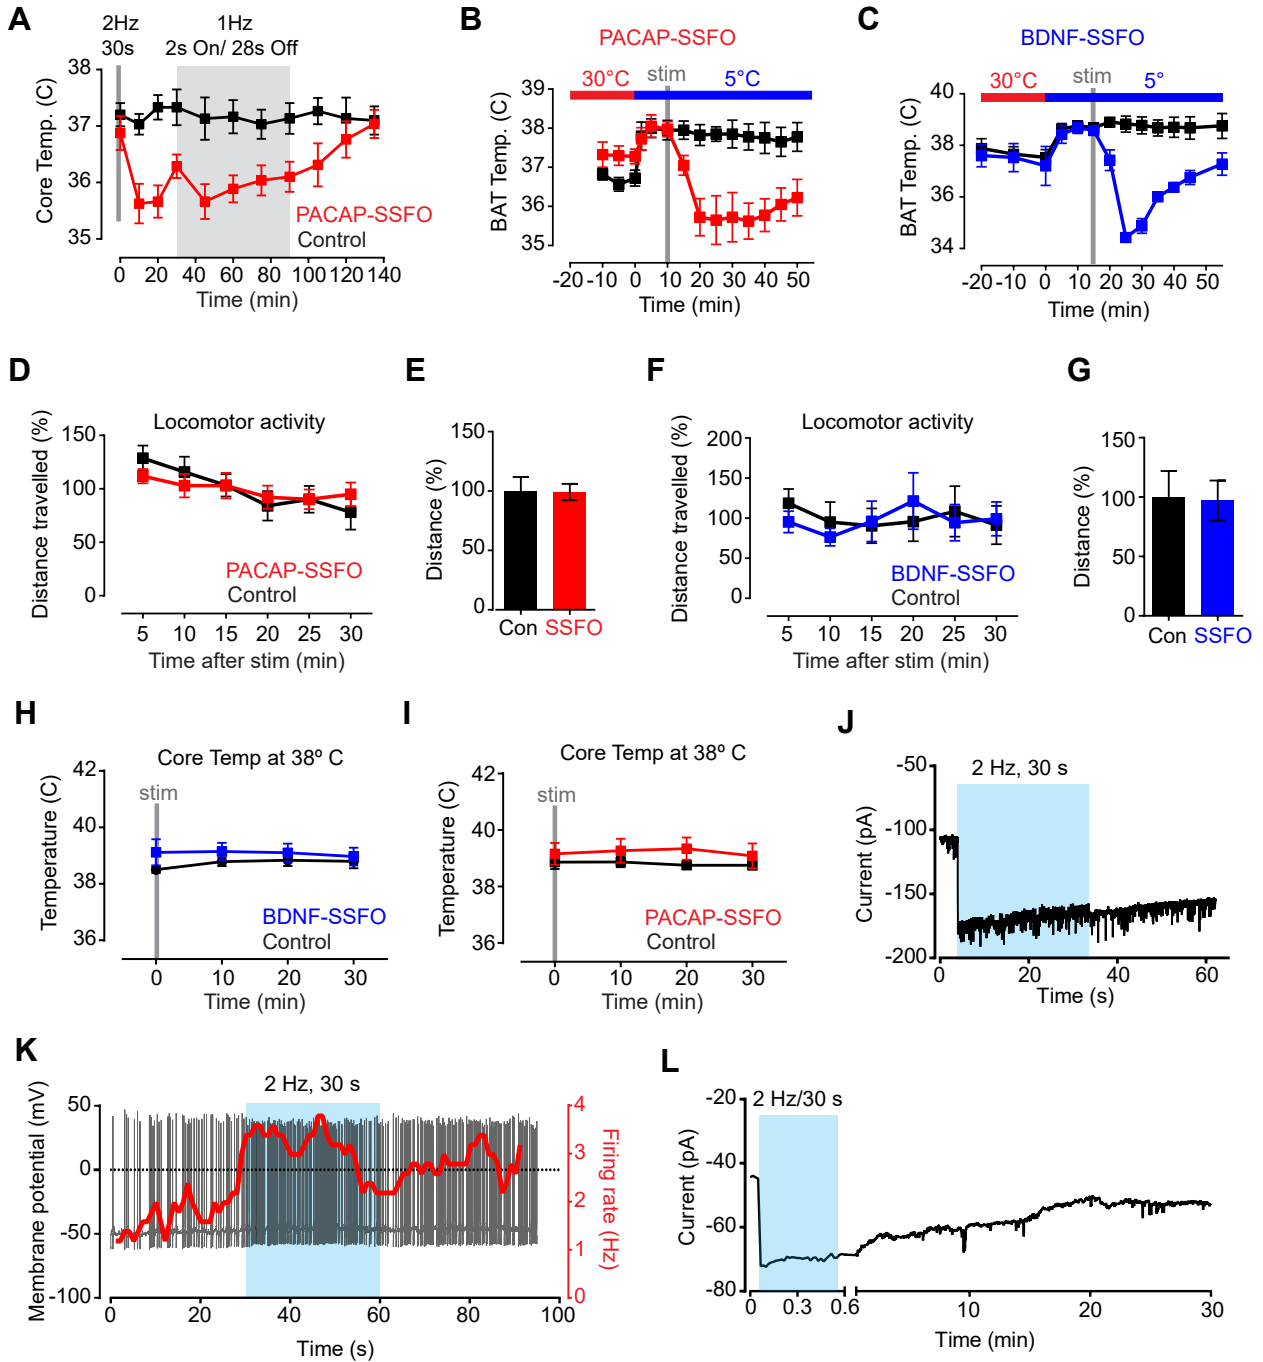

Figure S3, related to Figure 3

Supplement: NIHMS815480-supplement-3.pdf [file NIHMS815480-supplement-3.pdf]

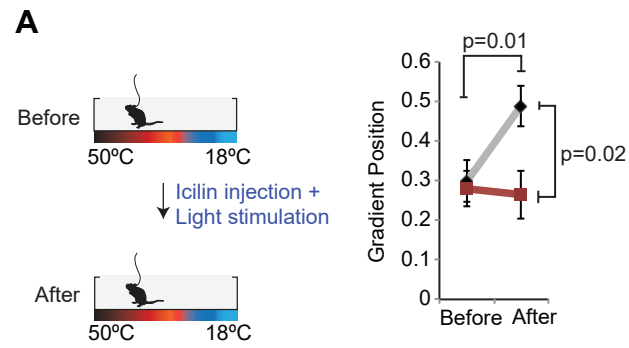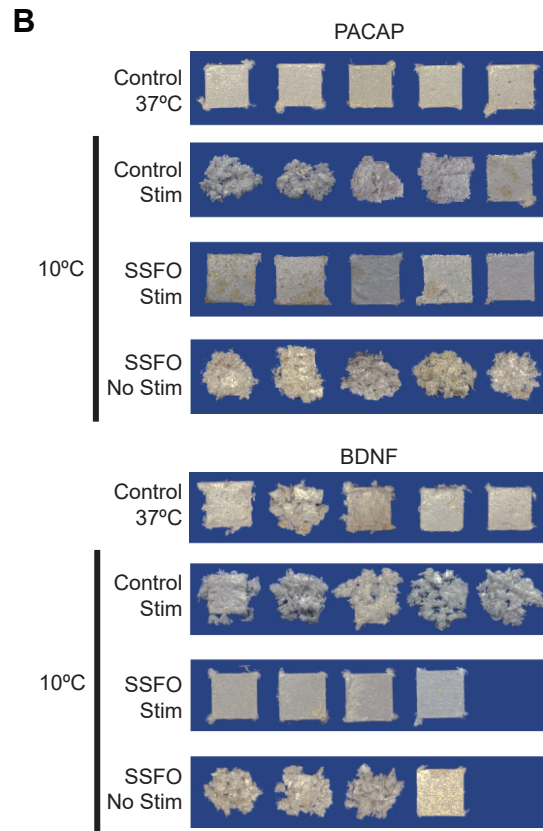

Figure S4, related to Figure 4

Supplement: NIHMS815480-supplement-4.pdf [file NIHMS815480-supplement-4.pdf]

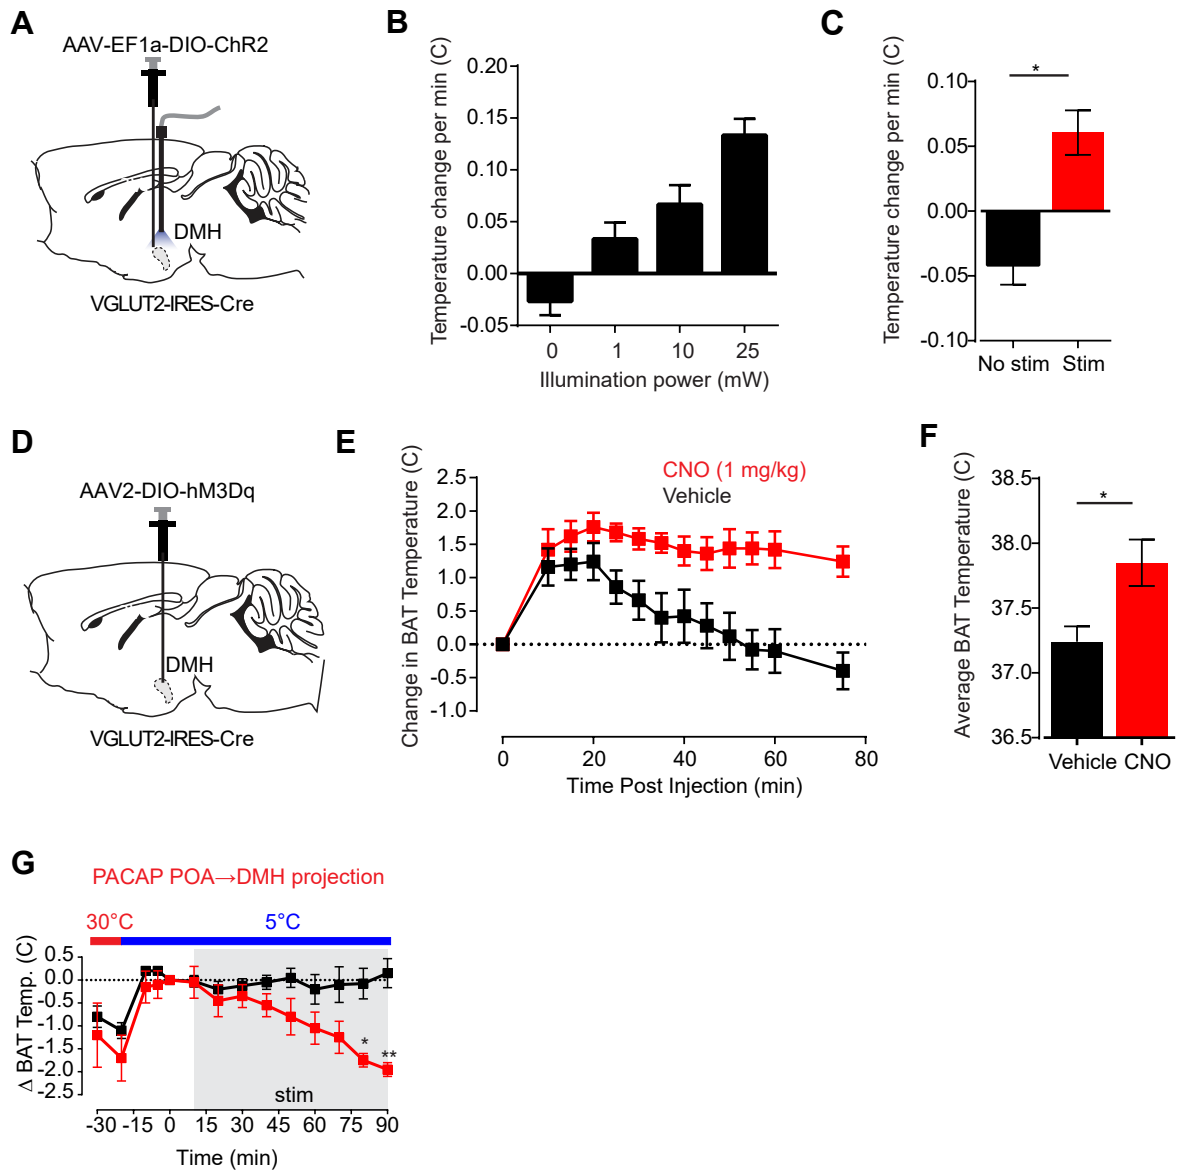

Figure S5, related to Figure 7

Supplement: NIHMS815480-supplement-5.pdf [file NIHMS815480-supplement-5.pdf]
